# Supplementary material
Source: Research Square preprint supplement (doi:10.21203/rs.3.rs-9801243/v1)
Supplement: Supplementary file 1 [file fec779ff9840e568b4c8f9c1.pdf]

---

## Supporting Information

---

### Chitosan-based Magnetic Iron Oxide Nanohybrids Enabling pH- Controlled Adsorption and Release of DNA

Ankur Verma<sup>1</sup>, Parmanand Kushwaha<sup>1</sup>, Manisha Behera<sup>2</sup>, Ramandeep Kaur<sup>1</sup>, Kumari Pragya<sup>1</sup>, Archisman Samanta<sup>1</sup>, Sovon Acharya<sup>3</sup>, Jaydeep Bhattacharya<sup>4</sup>, Sachinandan De<sup>1\*</sup>

<sup>1</sup>Animal Genomics Laboratory, Animal Biotechnology Division, ICAR-National Dairy Research Institute, Karnal, Haryana 132001, India

<sup>2</sup>Department of Zoology, Hindu College, University of Delhi, Delhi 110007, India

<sup>3</sup>School of Biotechnology, Amity University, Gurugram, Haryana 122412, India

<sup>4</sup>Nanobiotechnology Laboratory, School of Biotechnology, Jawaharlal Nehru University, New Delhi-110067, India

**SI 1.** Primers used in polymerase chain reaction for the amplification of *uidA* and *nuc* gene of *Escherichia coli* and *Staphylococcus aureus* respectively.

| Target organism  | Gene (primer)            | Sequence (5'→3')                  | Tm (°C) | Product size |
|------------------|--------------------------|-----------------------------------|---------|--------------|
| <i>E. coli</i>   | <i>uidA</i><br>(Forward) | TGGCAGGTGGTGGCAA<br>TGGTGGTG      | 60      | 200 bp       |
|                  | <i>uidA</i><br>(Reverse) | CCGACGCGCAGCGGGTA<br>GATAT        |         |              |
| <i>S. aureus</i> | <i>nuc</i><br>(Forward)  | GATGGCTATCAGTAATG<br>TTTCGAAAGGGC | 60      | 516 bp       |
|                  | <i>nuc</i><br>(Reverse)  | ACATAAGCAACTTTAGC<br>CAAGCCTTGACG |         |              |

**SI 2.** Weight % composition of iron oxide nanoparticles (IONP) and chitosan-coated iron oxide nanoparticles (IONP@Chitosan) by EDS analysis.

| <b>Element</b> | <b>Description</b> | <b>IONP</b> | <b>IONP@Chitosan</b> |
|----------------|--------------------|-------------|----------------------|
| <b>Fe</b>      | Iron               | 63.78       | 75.07                |
| <b>C</b>       | Carbon             | 19.89       | 17.43                |
| <b>O</b>       | Oxygen             | 16.34       | 6.80                 |
| <b>N</b>       | Nitrogen           | -           | 0.70                 |

**SI 3.** Atomic % composition of iron oxide nanoparticles (IONP) and chitosan-coated iron oxide nanoparticles (IONP@Chitosan) by EDS analysis.

| <b>Element</b> | <b>Description</b> | <b>IONP</b> | <b>IONP@Chitosan</b> |
|----------------|--------------------|-------------|----------------------|
| <b>Fe</b>      | Iron               | 29.90       | 41.11                |
| <b>C</b>       | Carbon             | 43.36       | 44.37                |
| <b>O</b>       | Oxygen             | 26.74       | 13.00                |
| <b>N</b>       | Nitrogen           | -           | 1.52                 |

**SI 4. Dynamic light scattering (DLS) measurements of uncoated iron oxide nanoparticles (IONPs) and chitosan-coated iron oxide nanoparticles (IONP@Chitosan).** Individual replicate values (n = 3) and corresponding mean  $\pm$  standard deviation (SD) are presented for hydrodynamic diameter (Z-average) and polydispersity index (PDI).

| <b>Sample</b>        | <b>Z-Average<br/>(d. nm)</b> | <b>Polydispersity<br/>Index (PDI)</b> | <b>Mean <math>\pm</math> SD<br/>(Size)</b> | <b>Mean <math>\pm</math> SD<br/>(PDI)</b> |
|----------------------|------------------------------|---------------------------------------|--------------------------------------------|-------------------------------------------|
| <b>IONP</b>          | <b>175.4</b>                 | <b>0.285</b>                          | <b>175.9 <math>\pm</math> 7.0</b>          | <b>0.324 <math>\pm</math> 0.040</b>       |
|                      | <b>169.1</b>                 | <b>0.321</b>                          |                                            |                                           |
|                      | <b>183.1</b>                 | <b>0.365</b>                          |                                            |                                           |
| <b>IONP@Chitosan</b> | <b>271.6</b>                 | <b>0.201</b>                          | <b>283.3 <math>\pm</math> 10.2</b>         | <b>0.275 <math>\pm</math> 0.064</b>       |
|                      | <b>290.3</b>                 | <b>0.307</b>                          |                                            |                                           |
|                      | <b>288.0</b>                 | <b>0.317</b>                          |                                            |                                           |

**SI 5. Zeta potential measurements of uncoated iron oxide nanoparticles (IONPs) and chitosan-coated iron oxide nanoparticles (IONP@Chitosan).** Individual replicate values (n = 3) and corresponding mean  $\pm$  standard deviation (SD) are presented.

| Sample        | Z-Potential (mV) | Mean $\pm$ SD (Zeta) |
|---------------|------------------|----------------------|
| IONP          | 6.20             | 7.51 $\pm$ 1.15      |
|               | 8.37             |                      |
|               | 7.95             |                      |
| IONP@Chitosan | 38.2             | 38.9 $\pm$ 1.82      |
|               | 37.5             |                      |
|               | 41.0             |                      |

**SI 6. Adsorption and desorption of genomic DNA of *Escherichia coli* and *Staphylococcus aureus* on uncoated iron oxide nanoparticles (IONPs) and chitosan-coated iron oxide nanoparticles (IONP@Chitosan).**

| Bacterial Species | Initial DNA Input ( $\mu$ g) | Nanoparticle Type | Adsorbed DNA (%) | Desorbed DNA ( $\mu$ g) | Desorption Efficiency (%) |
|-------------------|------------------------------|-------------------|------------------|-------------------------|---------------------------|
| <i>E. coli</i>    | 50.7                         | IONP              | 39.4             | 4.1                     | 8.1                       |
|                   |                              | IONP@Chitosan     | 92.8             | 38.5                    | 76.8                      |
| <i>S. aureus</i>  | 43.0                         | IONP              | 36.3             | 3.6                     | 8.4                       |
|                   |                              | IONP@Chitosan     | 90.5             | 31.5                    | 75.9                      |

**SI 7. The concentration of DNA in the adsorption-desorption process was measured quantitatively using uncoated iron oxide nanoparticles (IONP) and chitosan-coated iron oxide nanoparticles (IONP@Chitosan) with genomic DNA of *Escherichia coli* (I) and *Staphylococcus aureus* (II).** The reduction in DNA levels after adsorption and a large amount of recovery in the elution fractions are evidence of the high DNA-binding and release efficiency of IONP@Chitosan as compared to that of bare IONP. s = stock DNA (initial input); b<sub>1</sub>, w<sub>1</sub>, e<sub>1</sub> = binding supernatant, wash, and elution fractions of IONP; b<sub>2</sub>, w<sub>2</sub>, e<sub>2</sub> = binding supernatant, wash, and elution fractions of IONP@Chitosan.

| Sample                             | Concentration (ng/ $\mu$ l) |
|------------------------------------|-----------------------------|
| Stock DNA (s)                      | 507.4                       |
| Binding Solution (b <sub>1</sub> ) | 307.4                       |
| Washing Solution (w <sub>1</sub> ) | 70.7                        |
| Elution Solution (e <sub>1</sub> ) | 20.9                        |
| Binding Solution (b <sub>2</sub> ) | 36.3                        |
| Washing Solution (w <sub>2</sub> ) | -1.0*                       |
| Elution Solution (e <sub>2</sub> ) | 389.9                       |

(I)

| Sample                             | Concentration (ng/ $\mu$ l) |
|------------------------------------|-----------------------------|
| Stock DNA (s)                      | 430.5                       |
| Binding Solution (b <sub>1</sub> ) | 265.3                       |
| Washing Solution (w <sub>1</sub> ) | 59.6                        |
| Elution Solution (e <sub>1</sub> ) | 11.2                        |
| Binding Solution (b <sub>2</sub> ) | 40.8                        |
| Washing Solution (w <sub>2</sub> ) | -3.5*                       |
| Elution Solution (e <sub>2</sub> ) | 323.2                       |

(II)

\*Washing fractions which have negative value are the artifacts of NanoDrop baseline correction and reflects that the DNA concentration was below the detection limit.

**SI 8. Ultraviolet (UV) spectra of genomic DNA of *Escherichia coli* were measured prior to adsorption (control), following adsorption and following desorption. Left: uncoated iron oxide nanoparticles (IONP) were partially adsorbed and DNA could not be recovered completely, only 41.3 ng/ $\mu$ L DNA eluted. Right: DNA desorption was much higher in chitosan-coated iron oxide nanoparticles (IONP@Chitosan) with 389.9 ng/ $\mu$ L DNA obtained. These results are in line with the gel electrophoresis results in **Figure 6(a)**.**

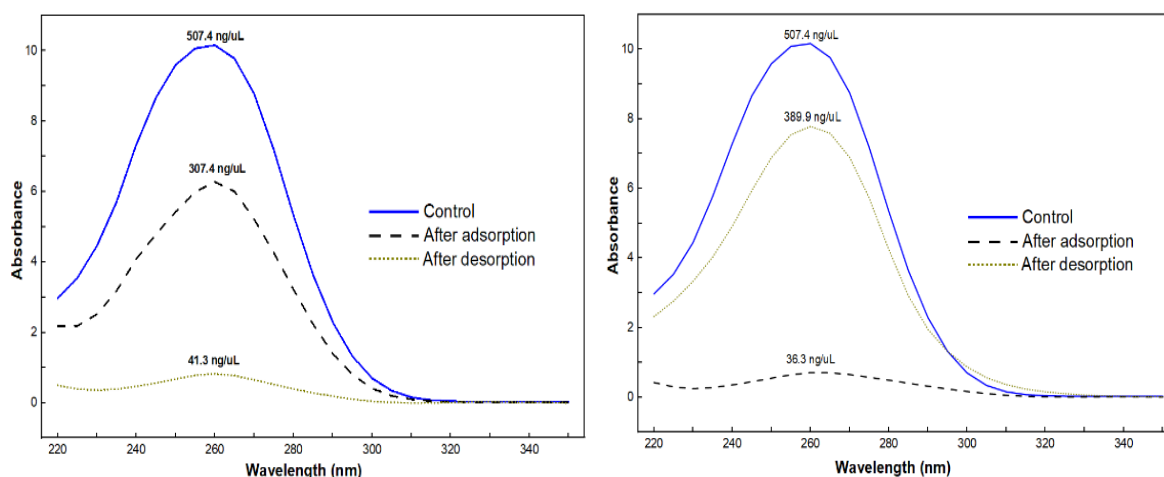

**SI 9. Ultraviolet (UV) spectra of genomic DNA of *Staphylococcus aureus* were measured prior to adsorption (control), following adsorption and following desorption.**

**Left:** when the iron oxide nanoparticles (IONPs) were not coated, the DNA yield was low with only 36.4 ng/μL of DNA eluted. **Right:** chitosan-coated iron oxide nanoparticles (IONP@Chitosan) have showed higher DNA desorption and 323.2 ng/μL DNA is obtained. The gel electrophoresis results outcomes and findings indicated in **Figure 6(b)** are supported by these observations.

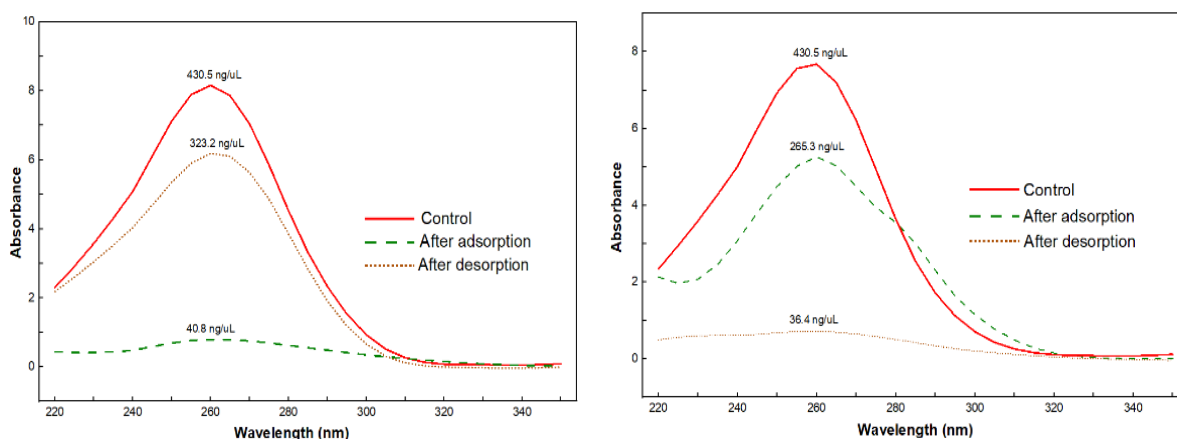

**SI 10. DNA yield and purity ratios of genomic DNA of *Escherichia coli* and *Staphylococcus aureus* using uncoated iron oxide nanoparticles (IONPs) and chitosan-coated iron oxide nanoparticles (IONP@Chitosan).**

| <b>Bacterial Species</b> | <b>Nanoparticle Type</b> | <b>DNA Yield (ng/μL)</b> | <b>A<sub>260/280</sub> Ratio</b> | <b>A<sub>260/230</sub> Ratio</b> |
|--------------------------|--------------------------|--------------------------|----------------------------------|----------------------------------|
| <i>E. coli</i>           | IONP                     | 14.3                     | 1.46                             | 1.10                             |
|                          | IONP@Chitosan            | 170.9                    | 1.95                             | 2.70                             |
| <i>S. aureus</i>         | IONP                     | 22.2                     | 2.70                             | 4.70*                            |
|                          | IONP@Chitosan            | 153.6                    | 1.86                             | 2.72                             |

**SI 11. Ultraviolet-visible (UV-Vis) spectrum of *Escherichia coli* genomic DNA (I) and *Staphylococcus aureus* genomic DNA (II) indicated increased absorbance at 260 nm with the use of chitosan-coated iron oxide nanoparticles (IONP@Chitosan) in comparison to the uncoated iron oxide nanoparticles (IONP) consistent with higher DNA recovery.**

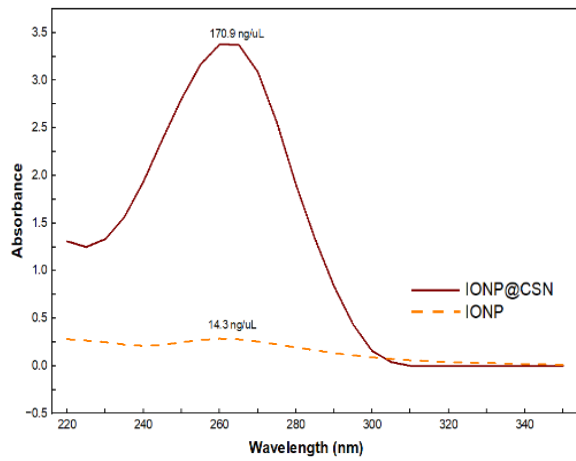

(I)

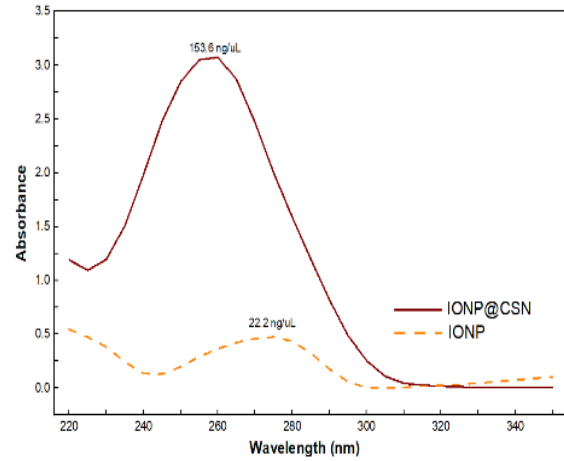

(II)

SI 12. Schematic illustration of  $\beta$ -(1 $\rightarrow$ 4)-linked chitosan-mediated functionalization of iron oxide nanoparticles and electrostatic interaction between protonated amine groups ( $-\text{NH}_3^+$ ) and the phosphate backbone of bacterial genomic DNA under acidic conditions.

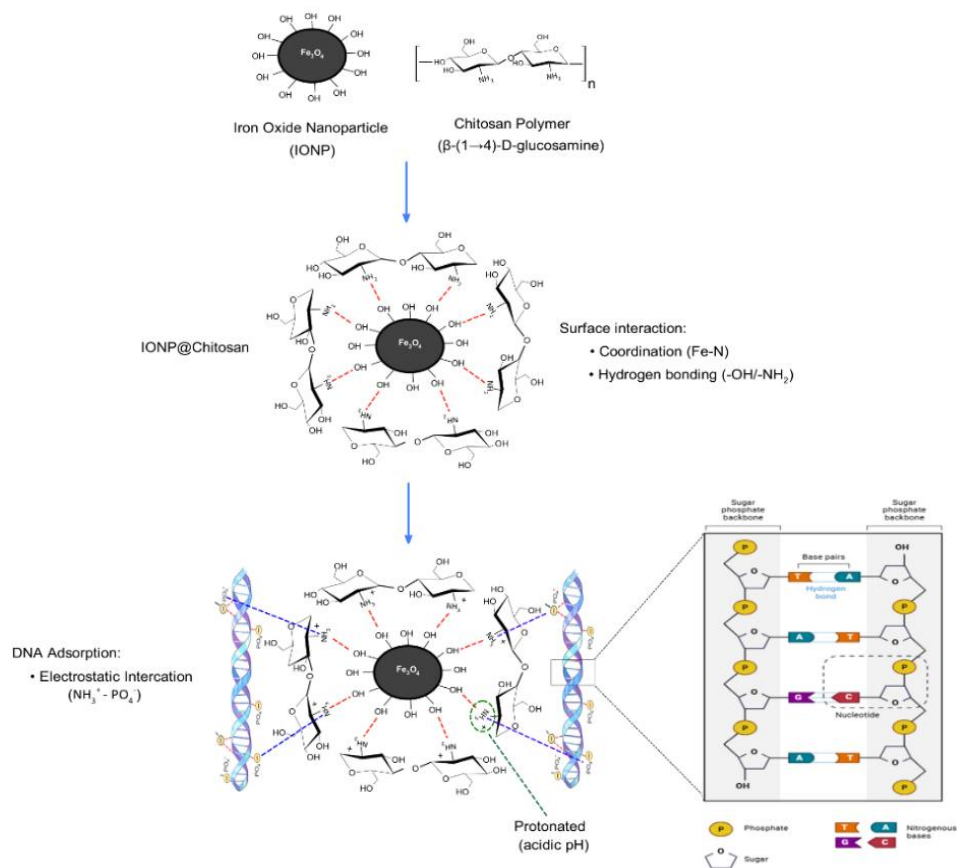

**SI 13.** Comparison of the adsorption and desorption capacity of the DNA on chitosan-coated iron oxide nanoparticles with the reported magnetic DNA adsorbents emphasizing on pH conditions, contact time, and extraction efficiency.

| Surface Functionalization                  | DNA Adsorbed             | pH              | Adsorption time (min) | Adsorption Efficiency (%) | Desorption time (min) | Desorption Efficiency (%) | Ref.             |
|--------------------------------------------|--------------------------|-----------------|-----------------------|---------------------------|-----------------------|---------------------------|------------------|
| <b>Mesoporous silica</b>                   | <i>Salmon sperm</i>      | 7.6             | 20                    | 83                        | 60                    | 89.5                      | [1]              |
| <b>Hemoglobin</b>                          | <i>Plasmid</i>           | 6.1             | 15                    | 68.3                      | 15                    | 68.3                      | [2]              |
| <b>Bromoacetic acid/acridine</b>           | <i>Plasmid</i>           | 6.2             | 15                    | 88                        | -                     | -                         | [3]              |
| <b>Montmorillonite</b>                     | <i>Salmon sperm</i>      | 2.0<br>-<br>5.0 | 30                    | 72                        | 140                   | 46.6                      | [4]              |
| <b>Polyethyleneimine</b>                   | <i>Salmon sperm</i>      | 4.0             | 20                    | 70                        | 5                     | 70.0                      | [5]              |
| <b>Zirconia</b>                            | <i>Tobacco</i>           | 2.0             | 20                    | 85                        | 5                     | 81.3                      | [6]              |
| <b>Polydopamine</b>                        | <i>Calf thymus</i>       | 2.0             | 10                    | 90                        | 10                    | -                         | [7]              |
| <b>1-hexyl-3-methylimidazolium bromide</b> | <i>Herring sperm</i>     | 3.0             | 20                    | 85                        | 30                    | 96.0                      | [8]              |
| <b>Chitosan-Nanotube-PEG</b>               | <i>Salmon sperm</i>      | 4.0             | 15                    | 88                        | -                     | 79.0                      | [9]              |
| <b>Au - Polyethyleneimine</b>              | <i>Salmon sperm</i>      | 5.0             | 20                    | 83                        | 20                    | 87.0                      | [10]             |
| <b>Zirconia phosphonates</b>               | <i>Salmon sperm</i>      | -               | 30                    | 92                        | 240                   | 89.0                      | [11]             |
| <b>PSG-NH<sub>2</sub>-SiO<sub>2</sub></b>  | <i>Plasmid</i>           | 5.0             | 20                    | 80                        | -                     | 56.3                      | [12]             |
| <b>Polyaniline Polypyrrole</b>             | <i>Aspergillus niger</i> | -               | 10                    | 96                        | 40 - 60               | -                         | [13]             |
| <b>Polyaniline</b>                         | <i>Salmon sperm</i>      | 3.8             | 10                    | 92                        | 2                     | 96.5                      | [14]             |
| <b>Chitosan-Polyaniline</b>                | <i>Salmon sperm</i>      | 3.6             | 10                    | 98                        | -                     | 66.0                      | [15]             |
| <b>PEDOT</b>                               | <i>Salmon sperm</i>      | 2.5             | 10                    | 60                        | 5                     | 94.2                      | [16]             |
| <b>Chitosan</b>                            | <i>E. coli/S. aureus</i> | 3.2             | 5                     | 92.8/90.5                 | 5                     | 76.8/75.9                 | <b>This work</b> |

#### SI 14. Uncropped gel images.

(a) Full-length uncropped agarose gel corresponding to **Figure 6(a)** showing genomic DNA adsorption and desorption by uncoated iron oxide nanoparticles (IONP) and chitosan-coated iron oxide nanoparticles (IONP@Chitosan) using *Escherichia coli* genomic DNA. Lanes: s, stock DNA; b<sub>1</sub> and b<sub>2</sub>, binding supernatants; w<sub>1</sub> and w<sub>2</sub>, wash fractions; e<sub>1</sub> and e<sub>2</sub>, elution fractions.

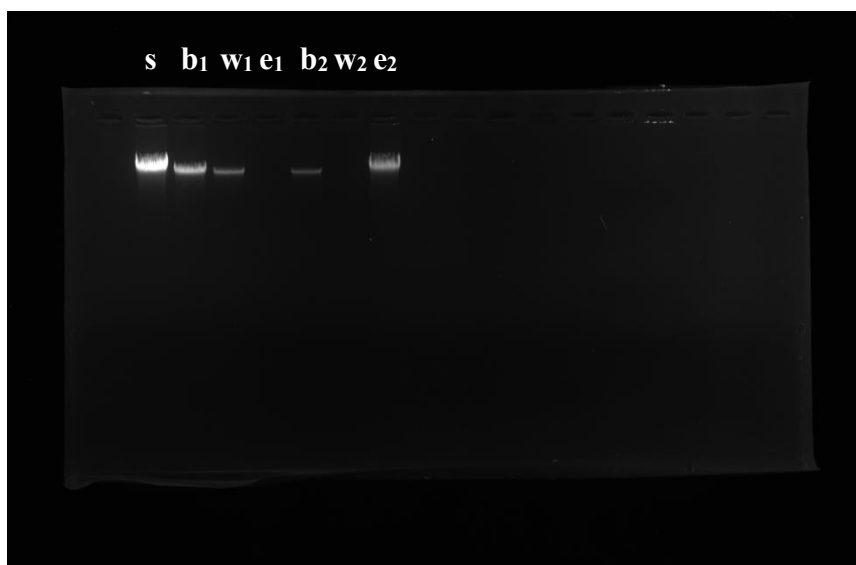

(b) Full-length uncropped agarose gel corresponding to **Figure 6(b)** showing genomic DNA adsorption and desorption by uncoated iron oxide nanoparticles (IONP) and chitosan-coated iron oxide nanoparticles (IONP@Chitosan) using *Staphylococcus aureus* genomic DNA. Lanes: s, stock DNA; b<sub>1</sub> and b<sub>2</sub>, binding supernatants; w<sub>1</sub> and w<sub>2</sub>, wash fractions; e<sub>1</sub> and e<sub>2</sub>, elution fractions.

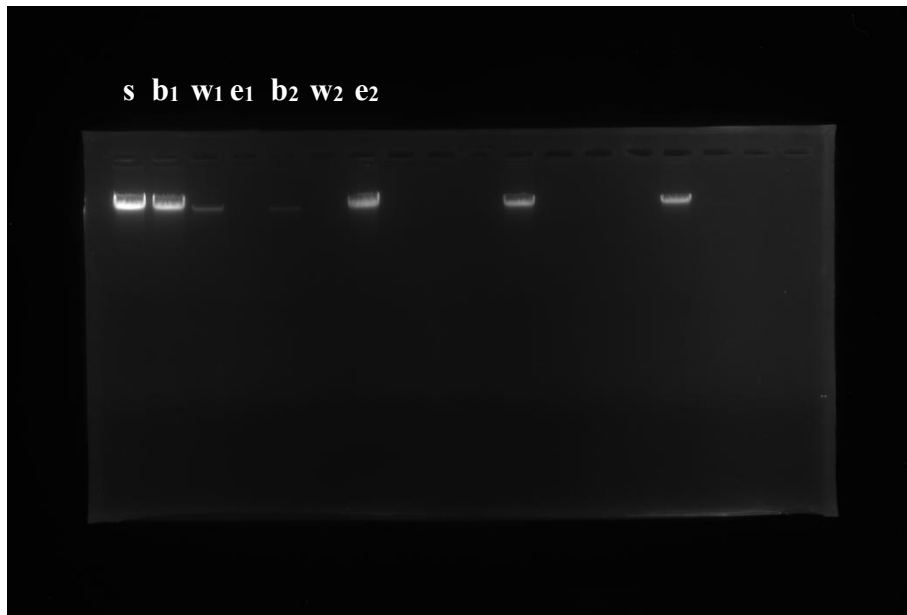

(c) Uncropped agarose gel corresponding to **Figure 7(a)** showing genomic DNA isolated from *Escherichia coli* using uncoated iron oxide nanoparticles (IONPs) and chitosan-coated iron oxide nanoparticles (IONP@Chitosan). Lanes N<sub>1</sub> and N<sub>2</sub> represent negative controls. Lane E<sub>1</sub> corresponds to DNA isolated using uncoated IONPs, whereas lane E<sub>2</sub> corresponds to DNA isolated using IONP@Chitosan.

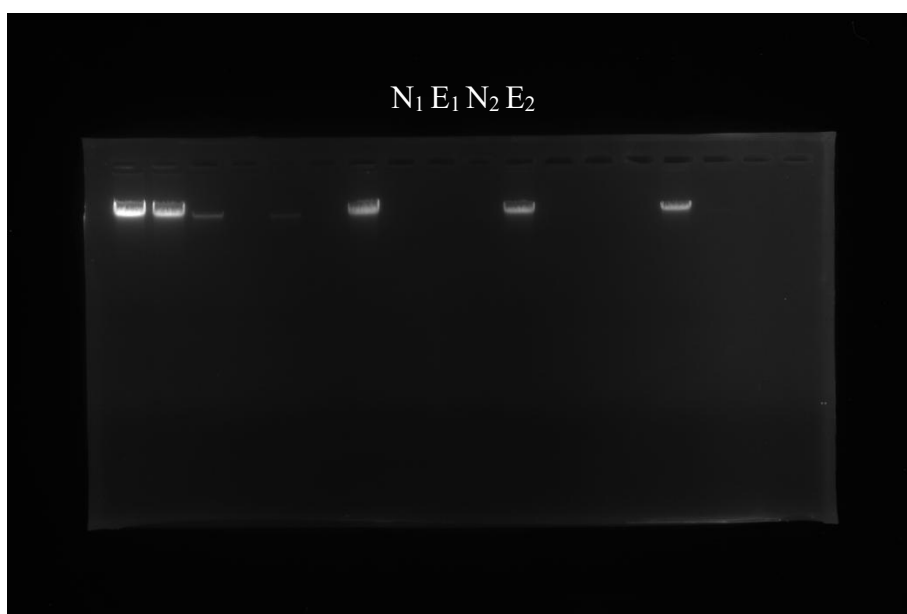

(d) Uncropped agarose gel corresponding to **Figure 7(b)** showing genomic DNA isolated from *Staphylococcus aureus* using uncoated iron oxide nanoparticles (IONPs) and chitosan-coated iron oxide nanoparticles (IONP@Chitosan). Lanes N<sub>1</sub> and N<sub>2</sub> represent negative controls. Lane S<sub>1</sub> corresponds to DNA isolated using uncoated IONPs, whereas lane S<sub>2</sub> corresponds to DNA isolated using IONP@Chitosan.

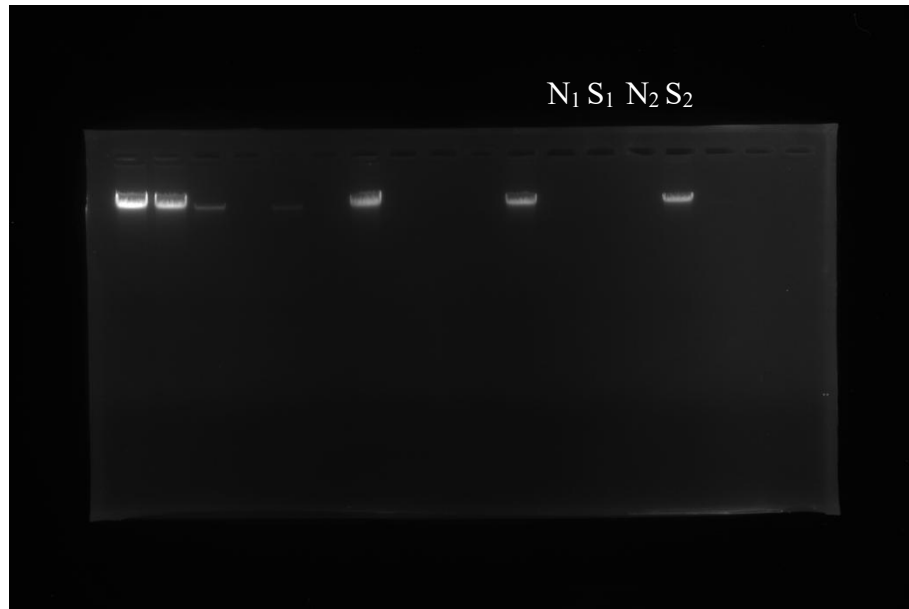

(e) Full-length uncropped agarose gel corresponding to **Figure 8(I)** showing PCR amplification of the *uidA* gene from *Escherichia coli* genomic DNA isolated using iron oxide nanoparticles (IONP) and chitosan-coated iron oxide nanoparticles (IONP@Chitosan). Additional lanes visible in the gel correspond to unrelated samples analyzed on the same gel and were not included in **Figure 8(I)**.

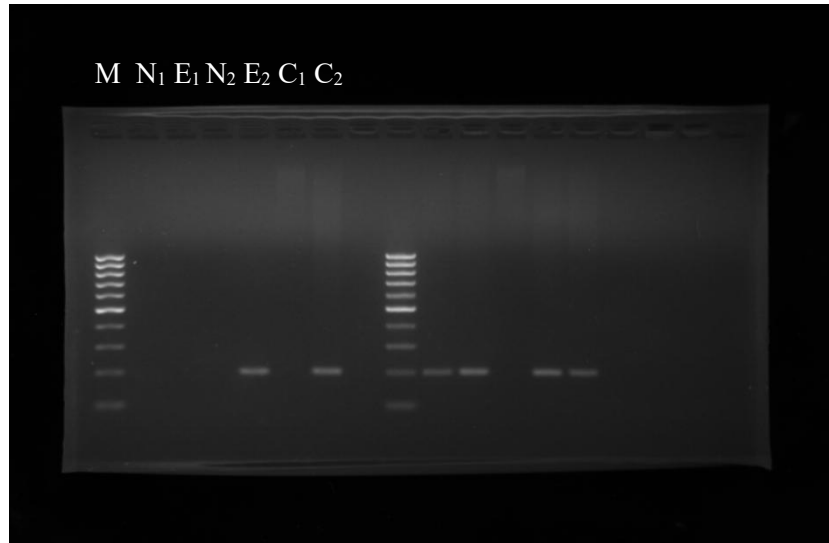

(f) Full-length uncropped agarose gel corresponding to **Figure 8(II)** showing PCR amplification of the *nuc* gene from *Staphylococcus aureus* genomic DNA isolated using iron oxide nanoparticles (IONP) and chitosan-coated iron oxide nanoparticles (IONP@Chitosan). Additional lanes visible in the gel correspond to unrelated samples analyzed on the same gel and were not included in **Figure 8(II)**.

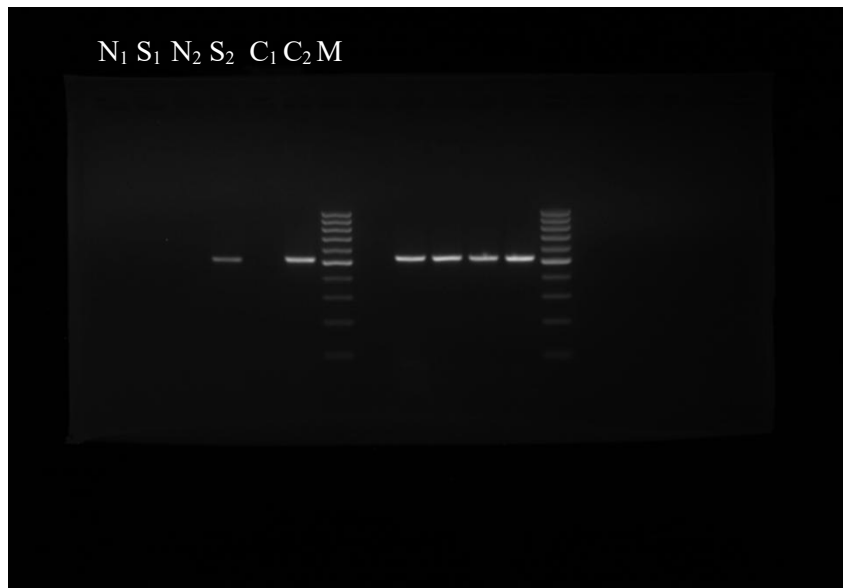

## REFERENCES

- [1] X. Li, J. Zhang, H. Gu, Adsorption and Desorption Behaviors of DNA with Magnetic Mesoporous Silica Nanoparticles, *Langmuir*, 27 (2011) 6099-6106.
- [2] X.-W. Chen, Q.-X. Mao, J.-W. Liu, J.-H. Wang, Isolation/separation of plasmid DNA using hemoglobin modified magnetic nanocomposites as solid-phase adsorbent, *Talanta*, 100 (2012) 107-112.
- [3] S.L. Sahoo, C.-H. Liu, Adsorption behaviors of DNA by modified magnetic nanoparticles: Effect of spacer and salt, *Colloids and Surfaces A: Physicochemical and Engineering Aspects*, 482 (2015) 184-194.
- [4] P. Cai, Q. Huang, X. Zhang, H. Chen, Adsorption of DNA on clay minerals and various colloidal particles from an Alfisol, *Soil Biology and Biochemistry*, 38 (2006) 471-476.
- [5] L.-L. Hu, B. Hu, L.-M. Shen, D.-D. Zhang, X.-W. Chen, J.-H. Wang, Polyethyleneimine–iron phosphate nanocomposite as a promising adsorbent for the isolation of DNA, *Talanta*, 132 (2015) 857-863.
- [6] M. Saraji, S. Yousefi, M. Talebi, Plasmid DNA purification by zirconia magnetic nanocomposite, *Analytical Biochemistry*, 539 (2017) 33-38.
- [7] Y. Wang, X. Ma, C. Ding, L. Jia, pH-responsive deoxyribonucleic acid capture/release by polydopamine functionalized magnetic nanoparticles, *Analytica Chimica Acta*, 862 (2015) 33-40.
- [8] M. Ghaemi, G. Absalan, Study on the adsorption of DNA on Fe<sub>3</sub>O<sub>4</sub> nanoparticles and on ionic liquid-modified Fe<sub>3</sub>O<sub>4</sub> nanoparticles, *Microchimica Acta*, 181 (2014) 45-53.
- [9] K. Xu, Y. Wang, H. Zhang, Q. Yang, X. Wei, P. Xu, Y. Zhou, Solid-phase extraction of DNA by using a composite prepared from multiwalled carbon nanotubes, chitosan, Fe<sub>3</sub>O<sub>4</sub> and a poly(ethylene glycol)-based deep eutectic solvent, *Microchimica Acta*, 184 (2017) 4133-4140.

- [10] H. Sun, X. Zhu, L. Zhang, Y. Zhang, D. Wang, Capture and release of genomic DNA by PEI modified Fe<sub>3</sub>O<sub>4</sub>/Au nanoparticles, *Materials Science and Engineering: C*, 30 (2010) 311-315.
- [11] Y. Tang, Y. Ren, X. Shi, Bifunctional Mesoporous Zirconium Phosphonates for Delivery of Nucleic Acids, *Inorganic Chemistry*, 52 (2013) 1388-1397.
- [12] S. Xu, X. Song, J. Guo, C. Wang, Composite Microspheres for Separation of Plasmid DNA Decorated with MNPs through in Situ Growth or Interfacial Immobilization Followed by Silica Coating, *ACS Applied Materials & Interfaces*, 4 (2012) 4764-4775.
- [13] L. Gai, X. Han, Y. Hou, J. Chen, H. Jiang, X. Chen, Surfactant-free synthesis of Fe<sub>3</sub>O<sub>4</sub>@PANI and Fe<sub>3</sub>O<sub>4</sub>@PPy microspheres as adsorbents for isolation of PCR-ready DNA, *Dalton Transactions*, 42 (2013) 1820-1826.
- [14] J.C. Medina-Llamas, A.E. Chávez-Guajardo, C.A.S. Andrade, K.G.B. Alves, C.P. de Melo, Use of magnetic polyaniline/maghemite nanocomposite for DNA retrieval from aqueous solutions, *Journal of Colloid and Interface Science*, 434 (2014) 167-174.
- [15] B.G. Maciel, R.J. da Silva, A.E. Chávez-Guajardo, J.C. Medina-Llamas, J.J. Alcaraz-Espinoza, C.P. de Melo, Magnetic extraction and purification of DNA from whole human blood using a  $\gamma$ -Fe<sub>2</sub>O<sub>3</sub>@Chitosan@Polyaniline hybrid nanocomposite, *Carbohydrate Polymers*, 197 (2018) 100-108.
- [16] da Silva, R. J., Pedro, G. C., Gorza, F. D. S., Maciel, B. G., Ratkovski, G. P., Mojica-Sanchez, L. C., Medina-Llamas, J. C., Chavez-Guajardo, A. E., & de Melo, C. P. (2021). DNA purification using a novel  $\gamma$ -Fe<sub>2</sub>O<sub>3</sub>/PEDOT hybrid nanocomposite. *Analytica Chimica Acta*, 1178, 338762.
